# Supplementary material
Source: PubMed Central journal article supplement (PMC4967351)

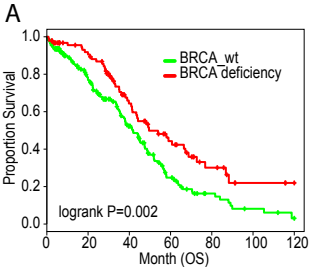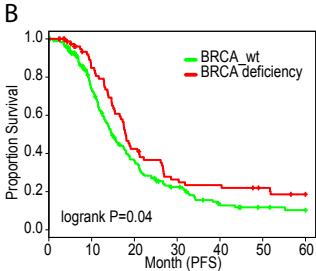

Supplement: NIHMS752176-supplement-1.pdf [file NIHMS752176-supplement-1.pdf]

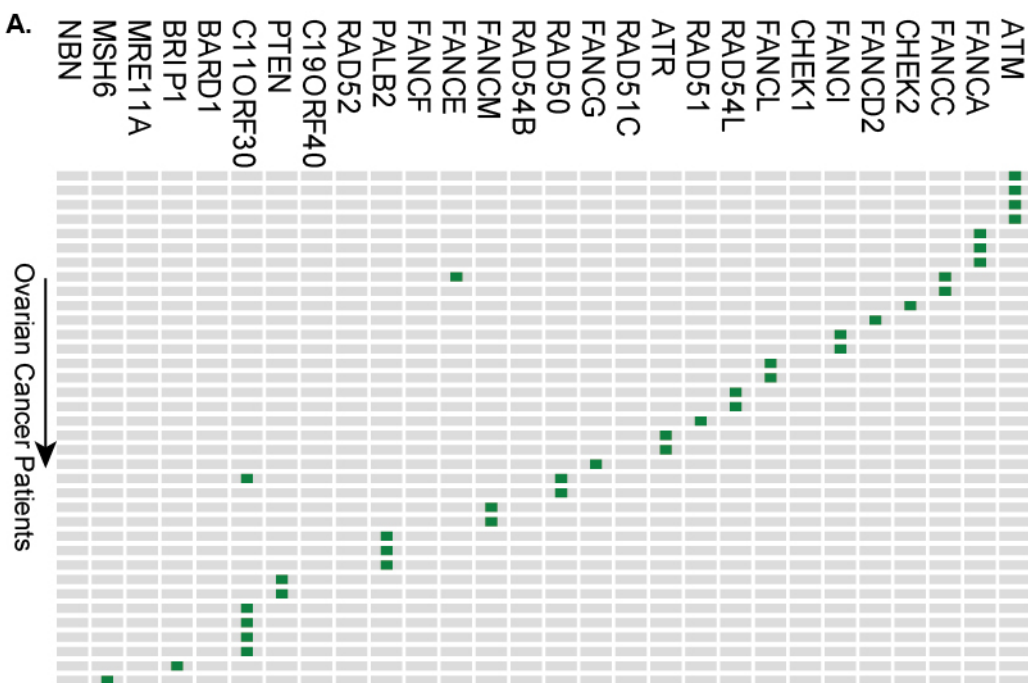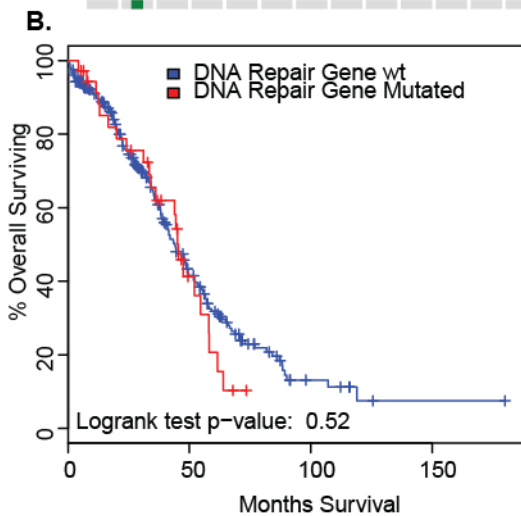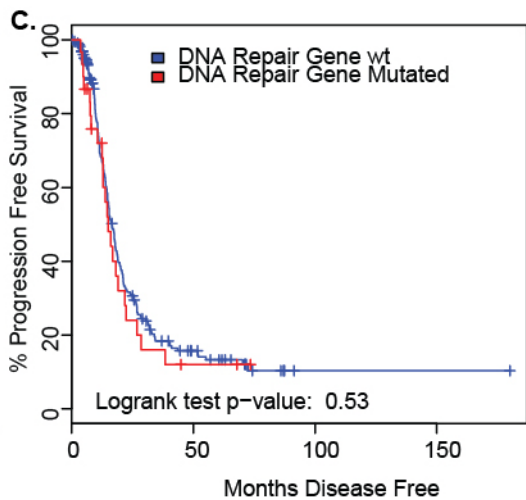

Supplement: NIHMS752176-supplement-2.pdf [file NIHMS752176-supplement-2.pdf]

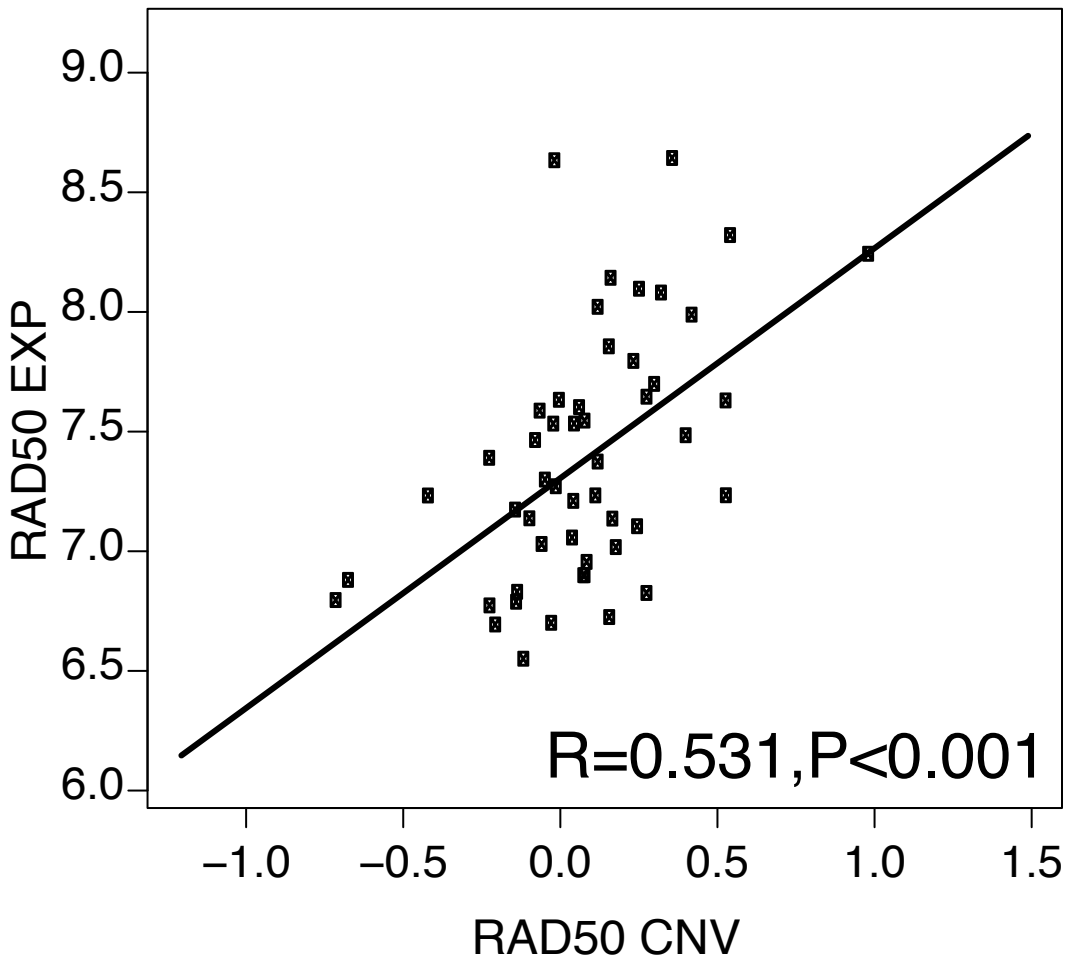

Supplement: NIHMS752176-supplement-3.pdf [file NIHMS752176-supplement-3.pdf]
